# Supplementary material for: Free-Ranging Dogs Are Capable of Utilizing Complex Human Pointing Cues
Source: PubMed Central journal article supplement (PMC6978287; doi:10.3389/fpsyg.2019.02818), 2020-01-17
Supplement: Data_Sheet_1.pdf [file Data_Sheet_1.pdf]

## *Supplementary Material*

**Movie S1** Video showing a human experimenter providing a momentary distal pointing cue to a free-ranging dog. The dog is exhibiting an affiliative response towards the experimenter.

**Movie S2** Video showing a human experimenter providing a dynamic distal pointing cue to a free-ranging dog. The dog is exhibiting an anxious response towards the experimenter.
